# Supplementary material
Source: PubMed Central journal article supplement (PMC1989716)
Supplement: biophysj_106.096602_1.pdf [file biophysj_106.096602_1.pdf]

## SUPPLEMENTARY MATERIAL

Table 1S: Parameters from exponential fits according to  $r(t) = \sum_{i=1}^n A_i \exp(-t/\tau_i) + r_\infty$  and  $r(t) = \sum_{i=1}^n A_i \exp[-(t/\tau_i)^{\frac{1}{h_i}}] + r_\infty$ , respectively.

| subtype                           | Temperature | $\tau_1$         | $A_1$ | $\tau_2$         | $A_2$ | $r_\infty$ | $h$  |
|-----------------------------------|-------------|------------------|-------|------------------|-------|------------|------|
|                                   | K           | s                | %     | s                | %     |            |      |
| <b>B*2709</b><br><b>-m9-C6-LY</b> | 295         | $1.9 \cdot 10^4$ | 9.5   | $9.4 \cdot 10^4$ | 90.5  | 0.030      | -    |
|                                   | 299         | $1.1 \cdot 10^4$ | 15.5  | $5.3 \cdot 10^4$ | 84.5  | 0.028      | -    |
|                                   | 303         | $1.0 \cdot 10^4$ | 47.2  | $4.7 \cdot 10^4$ | 52.8  | 0.026      | -    |
|                                   | 307         | $6.2 \cdot 10^3$ | 77.4  | $3.1 \cdot 10^4$ | 22.6  | 0.024      | -    |
|                                   | 310         | $5.3 \cdot 10^3$ | 76.1  | $1.4 \cdot 10^4$ | 23.9  | 0.022      | -    |
| <b>B*2705</b><br><b>-m9-C6-LY</b> | 299         | $1.7 \cdot 10^3$ | 1.1   | $5.1 \cdot 10^6$ | 98.9  | 0.028      | -    |
|                                   | 303         | $5.0 \cdot 10^2$ | 4.0   | $1.4 \cdot 10^6$ | 96.0  | 0.026      | -    |
|                                   | 310         | $4.1 \cdot 10^2$ | 3.0   | $1.1 \cdot 10^6$ | 97.0  | 0.022      | -    |
|                                   | 323         | -                | -     | $5.9 \cdot 10^4$ | 100   | 0.017      | 1.20 |
|                                   | 333         | -                | -     | $4.6 \cdot 10^3$ | 100   | 0.017      | 1.45 |
| <b>B*2709</b><br><b>-m9-C8-LY</b> | 295         | -                | -     | $2.5 \cdot 10^5$ | 100   | 0.028      | -    |
|                                   | 299         | -                | -     | $1.4 \cdot 10^5$ | 100   | 0.026      | -    |
|                                   | 303         | -                | -     | $6.4 \cdot 10^4$ | 100   | 0.024      | -    |
|                                   | 307         | -                | -     | $2.4 \cdot 10^4$ | 100   | 0.022      | -    |
|                                   | 310         | $3.4 \cdot 10^3$ | 16.7  | $1.5 \cdot 10^4$ | 83.3  | 0.021      | -    |
| <b>B*2705</b><br><b>-m9-C8-LY</b> | 299         | -                | -     | $4.9 \cdot 10^6$ | 100   | 0.026      | -    |
|                                   | 303         | -                | -     | $8.7 \cdot 10^6$ | 100   | 0.024      | -    |
|                                   | 310         | $1.0 \cdot 10^5$ | 13.5  | $2.0 \cdot 10^6$ | 86.5  | 0.021      | -    |
|                                   | 323         | $3.4 \cdot 10^3$ | 1.2   | $3.3 \cdot 10^5$ | 98.8  | 0.017      | -    |
|                                   | 328         | -                | -     | $8.3 \cdot 10^4$ | 100   | 0.015      | 1.87 |
|                                   | 333         | -                | -     | $3.8 \cdot 10^4$ | 100   | 0.015      | 1.86 |
